# Supplementary material
Source: PubMed Central journal article supplement (PMC10027474)
Supplement: mmc1.pdf [file mmc1.pdf]

**Supplemental information**

**Australian Genomics: Outcomes of a 5-year  
national program to accelerate the integration  
of genomics in healthcare**

**Zornitza Stark, Tiffany Boughtwood, Matilda Haas, Jeffrey Braithwaite, Clara L. Gaff, Ilias Goranitis, Amanda B. Spurdle, David P. Hansen, Oliver Hofmann, Nigel Laing, Sylvia Metcalfe, Ainsley J. Newson, Hamish S. Scott, Natalie Thorne, Robyn L. Ward, Marcel E. Dinger, Stephanie Best, Janet C. Long, Sean M. Grimmond, John Pearson, Nicola Waddell, Christopher P. Barnett, Matthew Cook, Michael Field, David Fielding, Stephen B. Fox, Jozef Gecz, Adam Jaffe, Richard J. Leventer, Paul J. Lockhart, Sebastian Lunke, Andrew J. Mallett, Julie McGaughran, Linda Mileshkin, Katia Nones, Tony Roscioli, Ingrid E. Scheffer, Christopher Semsarian, Cas Simons, David M. Thomas, David R. Thorburn, Richard Tothill, Deborah White, Sally Dunwoodie, Peter T. Simpson, Peta Phillips, Marie-Jo Brion, Keri Finlay, Michael C.J. Quinn, Tessa Mattiske, Emma Tudini, Kirsten Boggs, Sean Murray, Kathy Wells, John Cannings, Andrew H. Sinclair, John Christodoulou, and Kathryn N. North**

Table S1. Genomic testing approaches and diagnostic outcomes across each of the 13 rare disease and 6 cancer studies.

| Flagship study                         | Participants recruited, number | Diagnosis/ Actionable result (%) | Number of genomic tests |     |      |        | Relatives recruited, number |
|----------------------------------------|--------------------------------|----------------------------------|-------------------------|-----|------|--------|-----------------------------|
|                                        |                                |                                  | Panel                   | WES | WGS  | Other* |                             |
| <b>Rare disease</b>                    |                                |                                  |                         |     |      |        |                             |
| Acute Care Genomics                    | 450                            | 54                               | 0                       | 160 | 290  | 110    | 879                         |
| Neuromuscular disease                  | 114                            | 16                               | 49                      | 2   | 47   | 14     | 0                           |
| Mitochondrial disease                  | 140                            | 44                               | 0                       | 72  | 68   | 0      | 0                           |
| Epileptic encephalopathies             | 103                            | 28                               | 0                       | 103 | 0    | 0      | 0                           |
| Brain malformations                    | 102                            | 44                               | 0                       | 102 | 0    | 0      | 0                           |
| Leukodystrophies                       | 44                             | 41                               | 0                       | 44  | 0    | 0      | 8                           |
| Intellectual disability                | 69                             | 47                               | 0                       | 69  | 0    | 0      | 138                         |
| Genetic immune disorders               | 188                            | 17                               | 0                       | 188 | 0    | 0      | 250                         |
| Perinatal genomic autopsy              | 202                            | 28                               | 0                       | 194 | 0    | 0      | 620                         |
| Kidney genetics                        | 357                            | 43                               | 74                      | 210 | 51   | 22     | 0                           |
| Interstitial lung disease              | 35                             | 17                               | 0                       | 30  | 5    | 0      | 63                          |
| Cardiovascular disorders               | 600                            | 34                               | 0                       | 0   | 600  | 0      | 116                         |
| Unexplained end stage kidney disease   | 100                            | 20                               | 0                       | 0   | 100  | 0      | 0                           |
| <b>Cancer</b>                          |                                |                                  |                         |     |      |        |                             |
| Acute lymphoblastic leukemia           | 374                            | 100                              | 0                       | 0   | 0    | 519    | 0                           |
| Solid tumours (somatic)                | 368                            | 63                               | 308                     | 0   | 0    | 0      | 0                           |
| Inherited cancer syndromes             | 195                            | 7                                | 0                       | 0   | 195  | 0      | 19                          |
| Pediatric, adolescent and young adults | 1659                           | 6                                | 0                       | 0   | 1659 | 0      | 306                         |
| Lung cancer (somatic)                  | 54                             | 21                               | 0                       | 54  | 54   | 0      | 0                           |

|                            |      |    |     |      |      |     |      |
|----------------------------|------|----|-----|------|------|-----|------|
| Cancers of unknown primary | 118  | 92 | 92  | 0    | 30   | 78  | 0    |
| <b>TOTAL</b>               | 5273 |    | 523 | 1228 | 3107 | 743 | 2399 |

\*Transcriptome sequencing and multiplex ligation probe amplification (MLPA)
